# Supplementary material for: Histone demethylase JARID1C/KDM5C regulates Th17 cells by increasing IL-6 expression in diabetic plasmacytoid dendritic cells
Source: PubMed Central journal article supplement (PMC11383169; doi:10.1172/jci.insight.172959), 2024-06-24
Supplement: jciinsight-9-172959-s112.pdf [file jciinsight-9-172959-s112.pdf]

## SUPPLEMENTAL FIGURES & LEGENDS

| Sample ID | Sample Name | Group         |
|-----------|-------------|---------------|
| 1         | cont        | Control Group |
| 2         | DIO         | Group 1       |

### Genes Over-Expressed in Group 1 vs. Control Group

| Position | Gene Symbol | Fold Regulation | Comments | RT <sup>2</sup> qPCR Assay Catalog # |
|----------|-------------|-----------------|----------|--------------------------------------|
| A08      | Ciita       | 5.46            |          | PPM03368F                            |

### Genes Under-Expressed in Group 1 vs. Control Group

| Position | Gene Symbol | Fold Regulation | Comments | RT <sup>2</sup> qPCR Assay Catalog # |
|----------|-------------|-----------------|----------|--------------------------------------|
| A01      | Ash1l       | -2.65           |          | PPM31189C                            |
| A02      | Atf2        | -14.71          |          | PPM03036C                            |
| B09      | Hdac10      | -2.11           |          | PPM41767B                            |
| C05      | Hdac8       | -4.05           |          | PPM30920A                            |
| ** D02   | Kdm5c       | -3.73           |          | PPM31522A                            |
| F04      | Setd1a      | -2.72           |          | PPM41827C                            |
| F08      | Setd4       | -2.11           |          | PPM25607B                            |
| G01      | Setdb1      | -2.13           |          | PPM32502A                            |
| G09      | Usp16       | -2.01           | A        | PPM31724A                            |
| G10      | Usp21       | -2.31           | A        | PPM42218C                            |

**Supplemental Fig 1. Histone superarray in wound pDCs.** Wound pDCs from DIO mice and controls were subjected to a histone array studies (Abcam) detecting chromatin modifying enzyme changes, including JARID1C/KDM5C depletion (asterisks) in DIO wound pDCs.

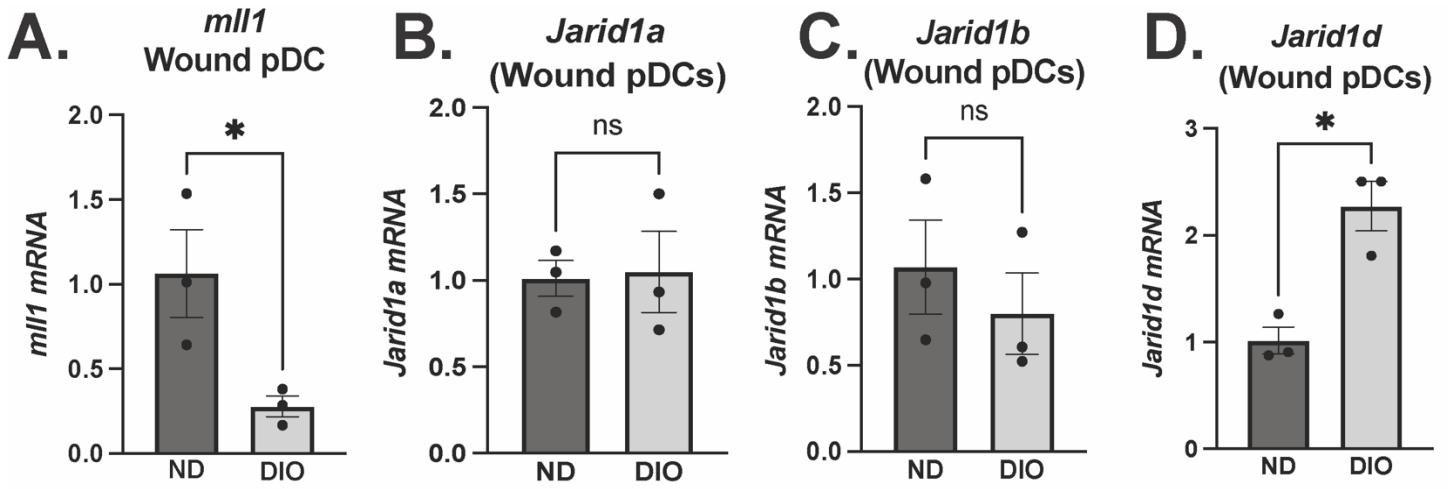

**Supplemental Fig 2. Evaluation of common H3K4me3 modifying enzymes on wound pDCs.** A) *mll1* gene expression in DIO wound pDCs. B) *Jarid1a* gene expression in DIO wound pDCs. C) *Jarid1b* gene expression in DIO wound pDCs. D) *Jarid1d* gene expression in DIO wound pDCs. For all experiments, N=4 mice/group, pooled, run as triplicates. \*p < 0.05. Data are presented as the mean ± SEM. Significance determined by paired student's t-test.

**A.** ChIP, *//6* Promoter  
(Wound pDCs)

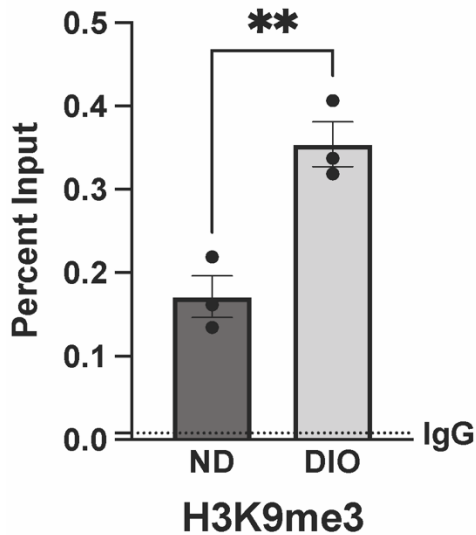

**B.** ChIP, *//6* Promoter  
(Wound pDCs)

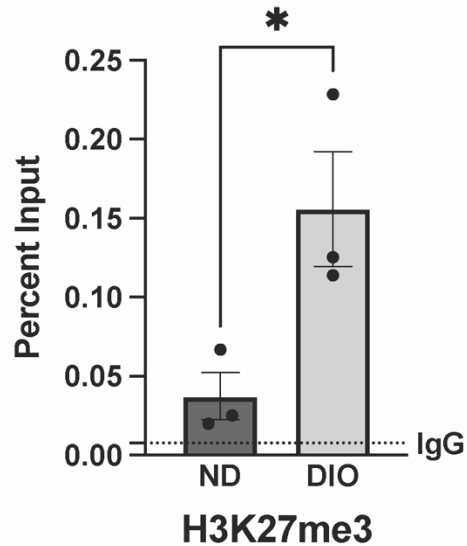

**C.** ChIP, *//6* Promoter  
(Wound pDCs)

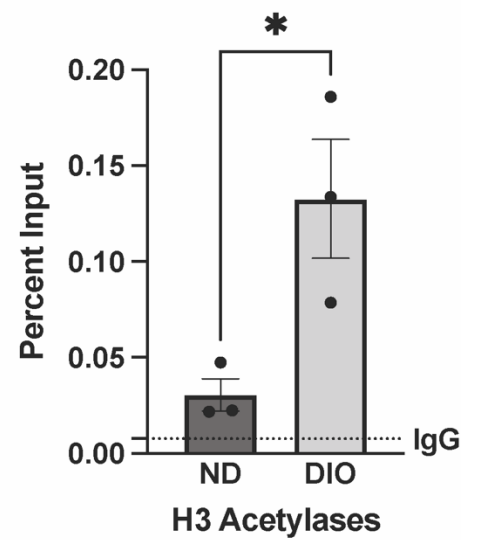

**Supplemental Fig 3. Screen of other H3 marks.** A) ChIP analysis of H3K9me3 on the *//6* promoter in ND and DIO wound pDCs. B) ChIP analysis of H3K27me3 mark on the *//6* promoter in ND and DIO wound pDCs. C) ChIP analysis of H3 acetylase mark on the *//6* promoter in ND and DIO wound pDCs. For all experiments, N=3 mice/group, pooled, run as technical triplicates. \* $p < 0.05$ , \*\* $p < 0.01$ , Data are presented as the mean  $\pm$  SEM. Significance determined by paired student's t-test.

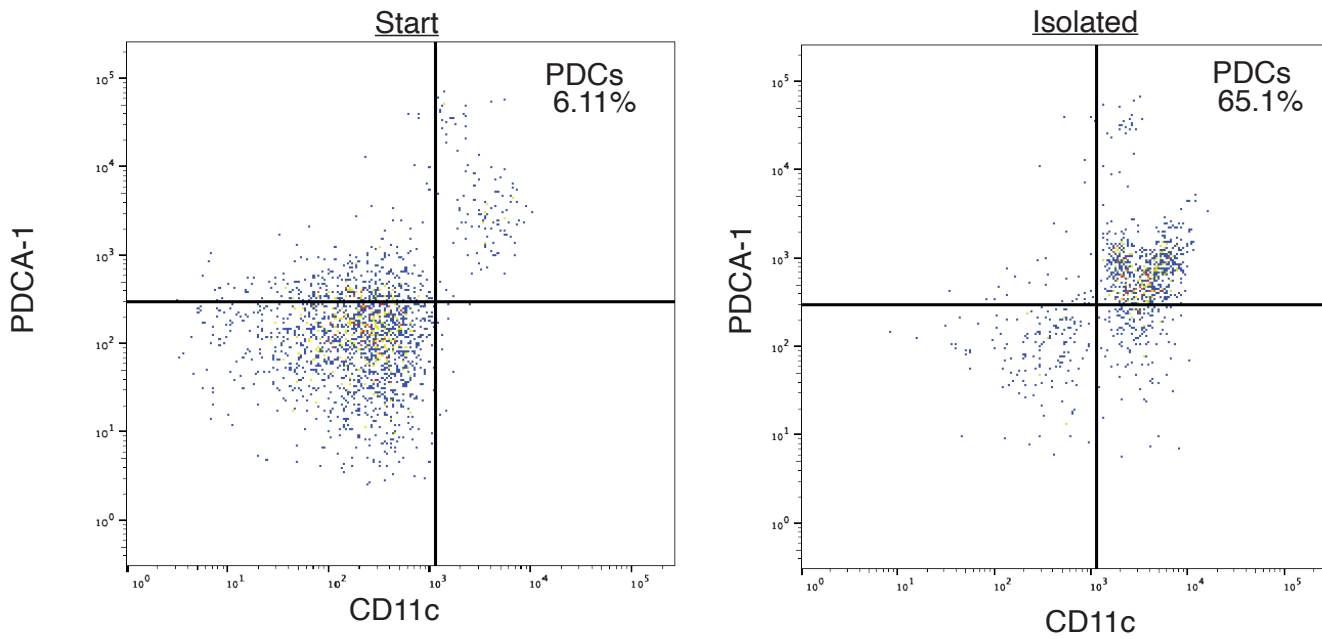

**Supplemental Fig 4. pDC Enrichment.** Sample flow cytometry showing pDC enrichment following isolation from wounds with EasySep™ Mouse Plasmacytoid DC magnetic bead isolation kits (catalog #:19764) according to manufacturer instructions.



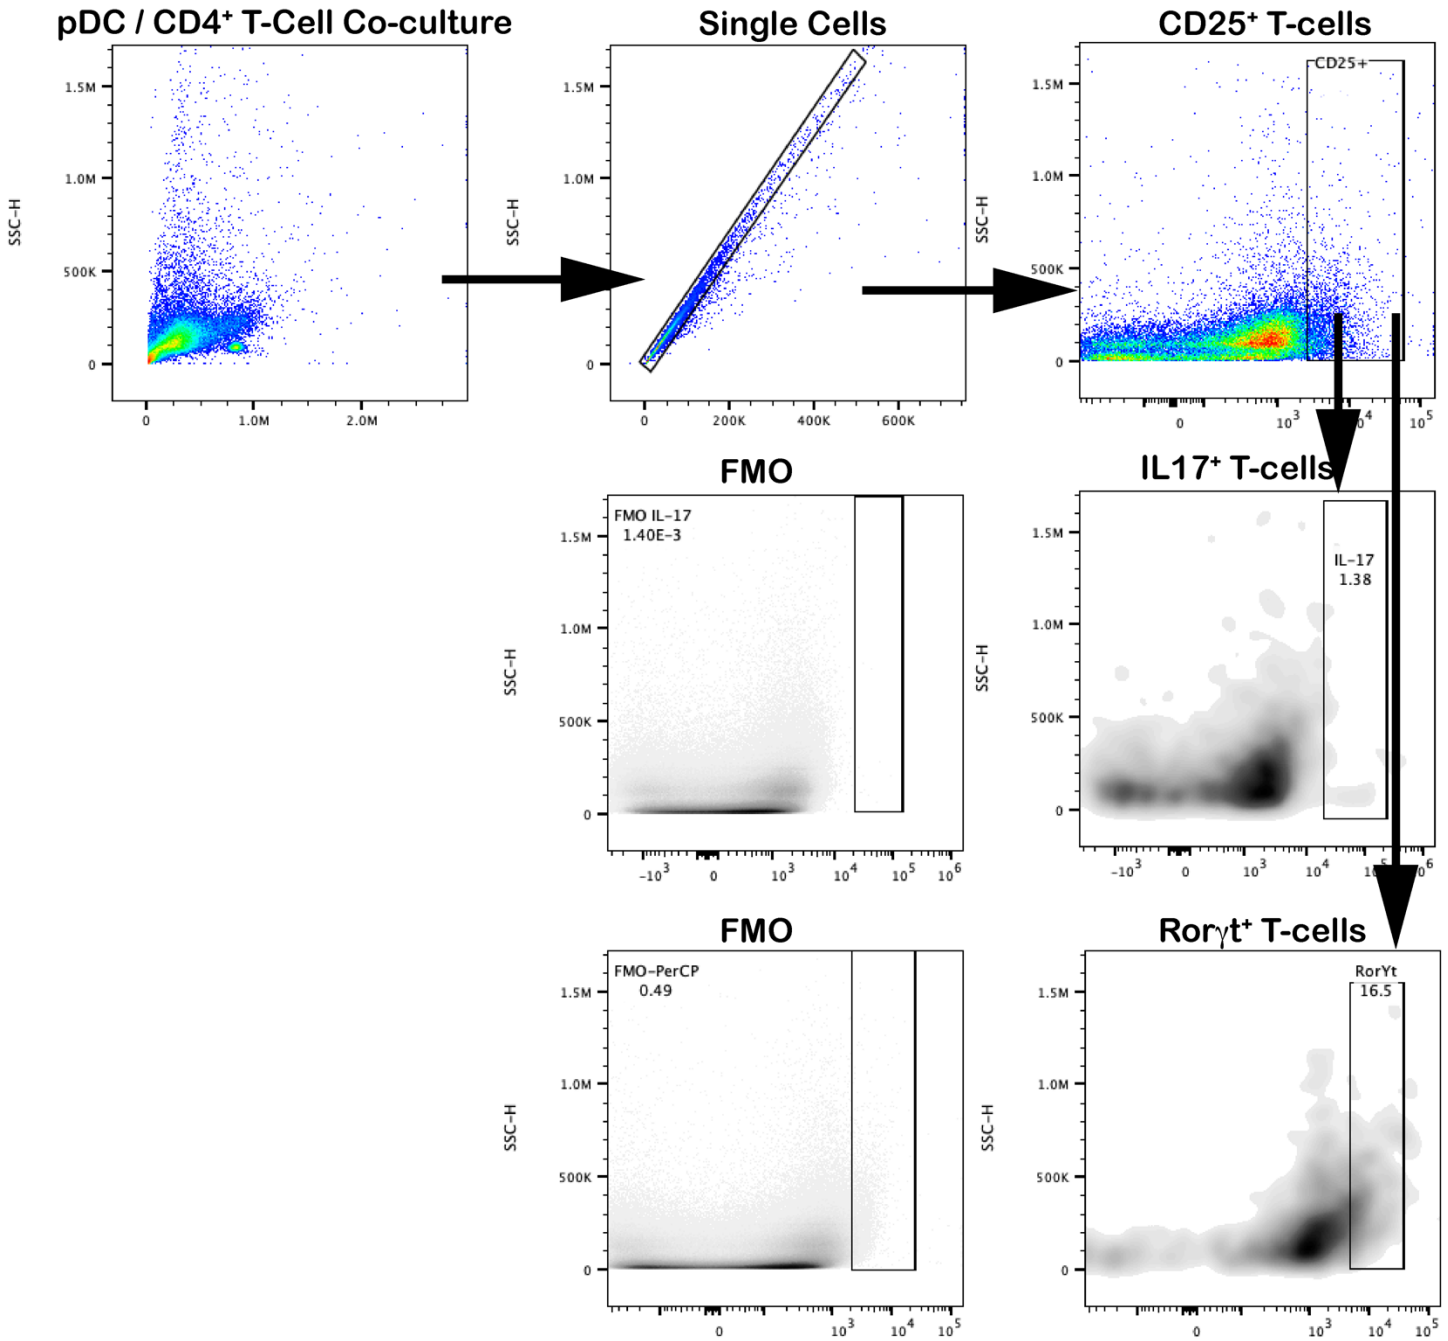

**Supplemental Fig 5. Naïve CD4 T-cell gating strategy following co-culture with pDC.** Sample flow cytometry gating for Rorγt and IL17 in CD4<sup>+</sup>, CD25<sup>+</sup> T-cells following co-culture experiments with either ND or DIO pDCs (72hr incubation; 10:1 T-cell:pDC ratio). T-cells were isolated using EasySep™ Mouse Naïve CD4<sup>+</sup> T-cell magnetic bead isolation kit (catalog #: 19765) and pDC were isolated using EasySep™ Plasmacytoid DC magnetic bead isolation kits (catalog #:19764) according to manufacturer instructions.

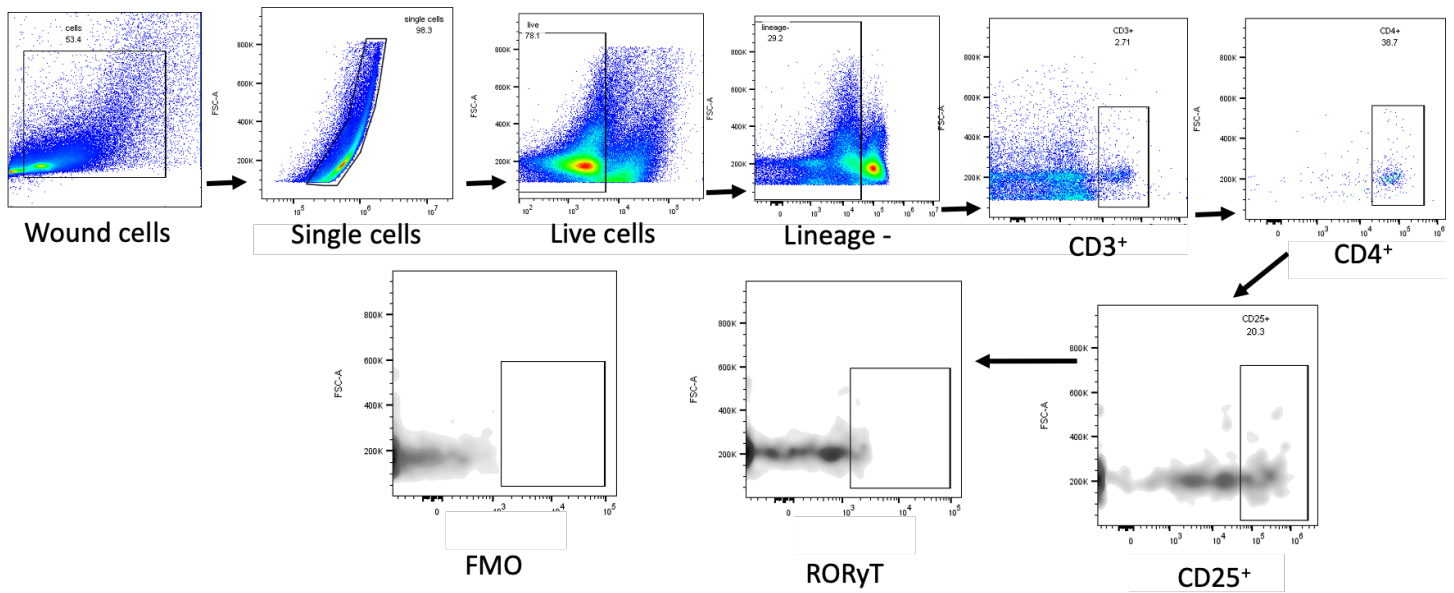

**Supplemental Fig 6. Wound T-cell gating strategy.** Example flow cytometry gating for Ror $\gamma$ t in CD4<sup>+</sup>, CD25<sup>+</sup> T-cells derived directly from murine ND or DIO wounds on day 5 after wounding. Whole wound cells were harvested, minced, and filtered (100  $\mu$ m filter) and the filtrate subjected to flow cytometry after staining for relevant T-cell extracellular and intracellular antibodies (Ror $\gamma$ t).

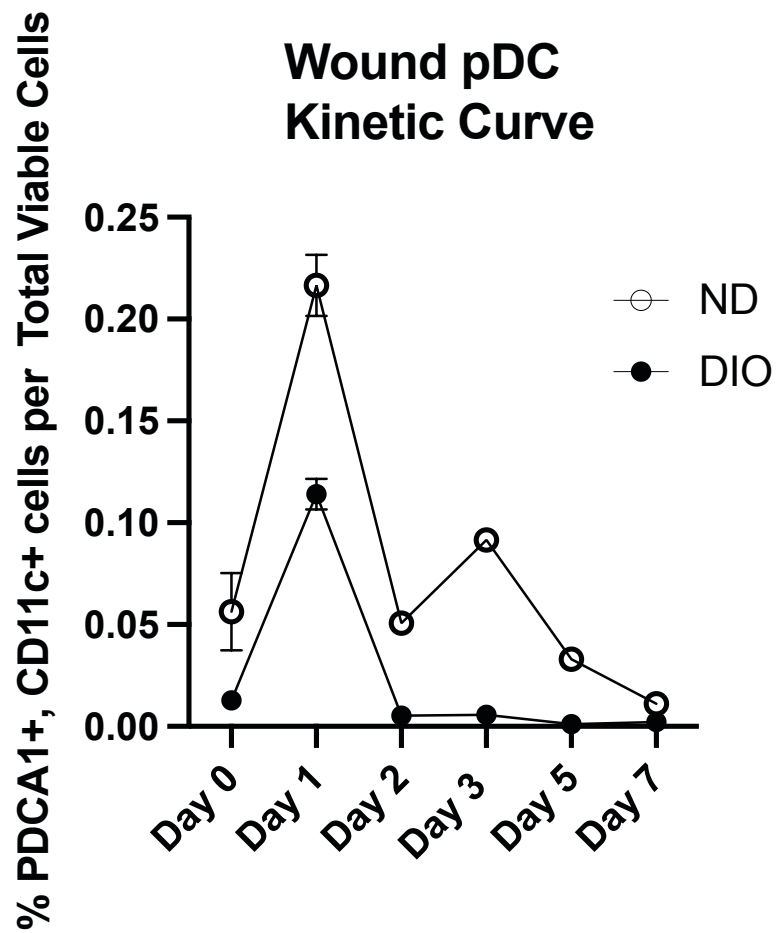

**Supplemental Fig 7. Wound pDC quantity.** Using flow cytometry, kinetic plot of non-diabetic (ND) and diabetic (DIO) wound pDCs from 6mm wounds days after wounding (N=5/group, pooled and repeated in triplicate).

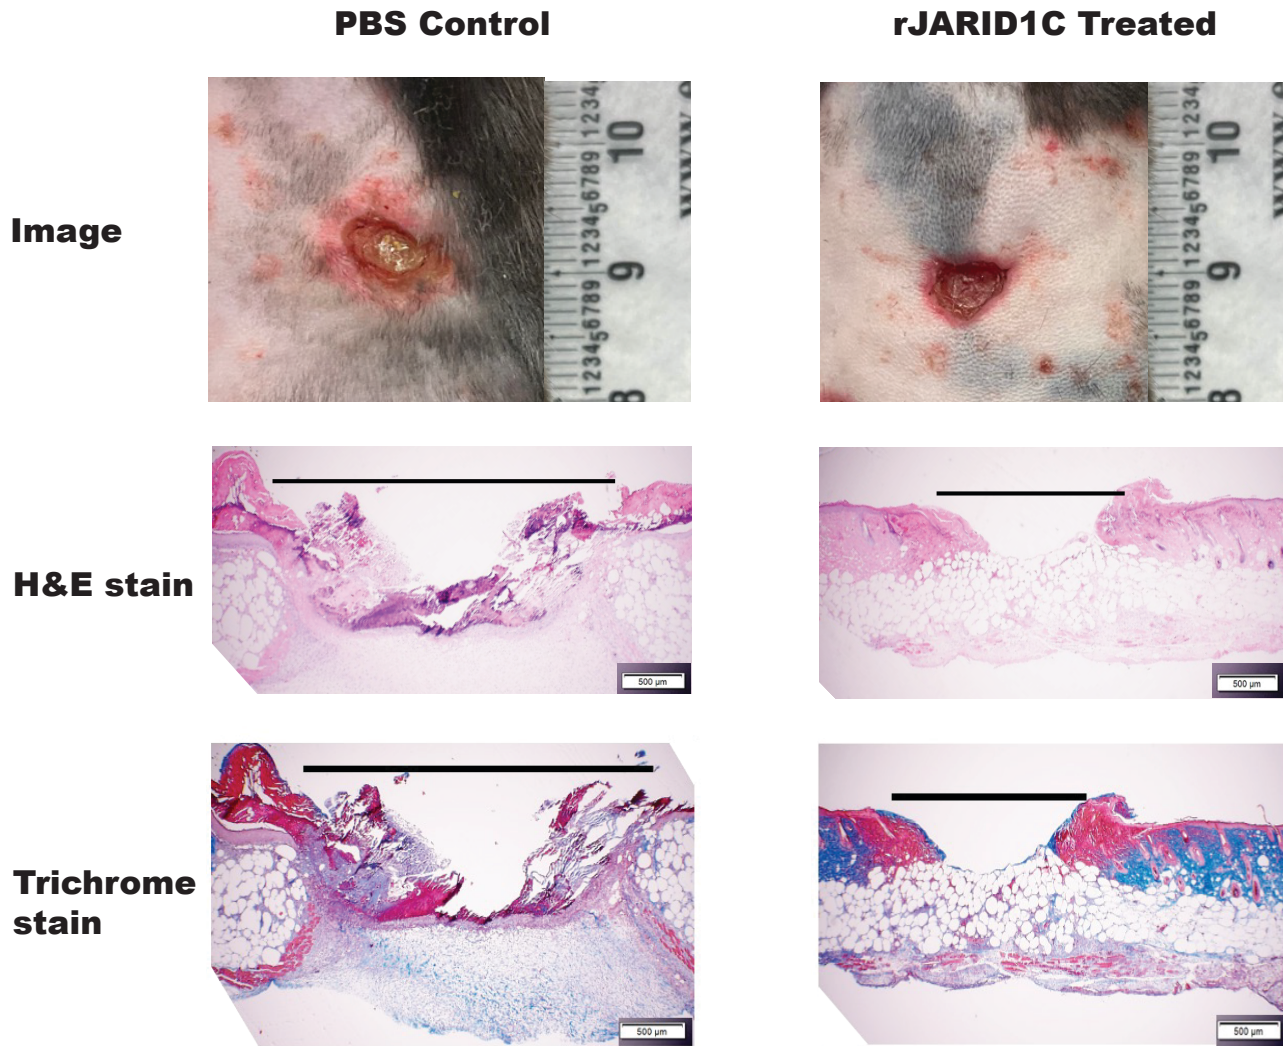

**Supplemental Fig 8. rJARID1C supplementation on DIO wound healing.** 6mm punch wounds were created on the dorsum of DIO mice and harvested on wound day 5 following peri-wound PBS injection (control) or recombinant JARID1C injection (1  $\mu$ g/kg) on days 0 and 1. Images obtained on wound day 3. Representative histologic H&E stain and trichrome staining (collagen) is shown on day 5 wounds. Wound sizes are represented with line bars that span wound edges. Scale bars are shown. N = 4 wounds/mouse
